# Supplementary material for: Unfolding and identification of membrane proteins in situ
Source: eLife. 2022 Sep 12;11:e77427. doi: 10.7554/eLife.77427 (PMC9531951; doi:10.7554/eLife.77427)
Supplement: Supplementary file 1. [file elife-77427-supp1.docx]

| | lasmids | Vector | Provider | Company | | --- | --- | --- | --- | | peGFP-N1 |  | Prof. Guidalberto Manfioletti |  | | mTMEM16A-GFP | peGFP-N1 | Prof. Anna Menini |  | | mTMEM16F-GFP | peGFP-N1 | Prof. Anna Menini |  | | 6xHis-N2B-mTMEM16F-GFP | peGFP-N1 |  | GENEWIZ | | 6xHis-N2B-mTRPC1-GFP | peGFP-N1 |  | GENEWIZ | | 6xHis-N2B-mTRPC5-GFP | peGFP-N1 |  | GENEWIZ | | 6xHis-N2B-mTRPC6-GFP | peGFP-N1 |  | GENEWIZ | | mCherry-Lifeact-7 |  | Prof. Michael Davidson | Addgene | |
| --- | --- | --- | --- | --- | --- | --- | --- | --- | --- | --- | --- | --- | --- | --- | --- | --- | --- | --- | --- | --- | --- | --- | --- | --- | --- | --- | --- | --- | --- | --- | --- | --- | --- | --- | --- | --- |
|  |
| **Table S1** |
| List of plasmids.  The cDNA of TRPC1/5/6 were from Miao Ling Plasmid Company. All the 6xHis-N2B-Protein-GFP construct is made by Genewiz company. |

| | No | Name | Sequence(20bp) | | | --- | --- | --- | --- | |  |  |  |  | | 1 | plentiCRISPR V2-TRPC1- sgRNA1(mouse) | ccgtaagcccacctgtaaga | | |  |  | |  | | 2 | plentiCRISPR V2-TRPC1- sgRNA2(mouse) | acgcttgtagcagaagggct | | |  |  | |  | | 3 | plentiCRISPR V2-TRPC5- sgRNA1(mouse) | attactctacgccatccgca | | |  |  | |  | | 4 | plentiCRISPR V2-TRPC5- sgRNA2(mouse) | ggagtgtgtatccagttcgg | | |  |  | |  | | 5 | plentiCRISPR V2-TRPC6- sgRNA1(mouse) | gcggcagacgattcttcgtg | | |  |  | |  | | 6 | plentiCRISPR V2-TRPC6- sgRNA2(mouse) | taaaggttatgtacggattg | | |  |  | |  | | 7 | plentiCRISPR V2-TMEM16F- sgRNA1(mouse) | agcgagcgttacctcctgta | | |  |  | |  | | 8 | plentiCRISPR V2-TMEM16F- sgRNA2(mouse) | ctctcgggtcaaataccaag | | |  |  | |  | | 9 | plentiCRISPR V2-control-sgRNA | tcttgagtttgtaacagctg | | |
| --- | --- | --- | --- | --- | --- | --- | --- | --- | --- | --- | --- | --- | --- | --- | --- | --- | --- | --- | --- | --- | --- | --- | --- | --- | --- | --- | --- | --- | --- | --- | --- | --- | --- | --- | --- | --- | --- | --- | --- | --- | --- | --- | --- | --- | --- | --- | --- | --- | --- | --- | --- | --- | --- | --- | --- | --- | --- | --- | --- | --- | --- | --- | --- | --- | --- | --- | --- | --- | --- | --- | --- | --- | --- | --- | --- | --- |
| **Table S2** |
| sgRNA Sequences.  The sgRNA sequences cloned into LentiCRISPR-V2 puro vector were purchased from Miao Ling Plasmid Company. |
